# Supplementary material
Source: publisher site journal article supplement (https://www.dovepress.com/article/562498)
Supplement: Supplementary file 1 [file 562498%20Revised%20Manuscript_supplementary%20tables_1.docx]

**Supplemental Table 1.** Annual asthma and COPD exacerbation rates among severe asthma patients with concomitant COPD initiating benralizumab

|  | Severe Asthma Patients  with Concomitant COPD, N=2,894 | | |
| --- | --- | --- | --- |
|
| Pre Index | Post Index | Relative Change, % *(p*-value) |
| **Asthma exacerbations** |  |  |  |
| Presence of ≥ 1 exacerbation, n (%) | 2,894 (100.0%) | 2,222 (76.8%) | -23.2% (<0.001) |
| AAER, mean (SD) | 4.00 (2.18) | 2.43 (2.40) | -39.2% (<0.001) |
| Median (IQR) | 3.00 (3.00) | 2.00 (3.00) |  |
| **Total (moderate + severe) COPD exacerbations** |  |  |  |
| Presence of ≥ 1 exacerbation, n (%) | 2,698 (93.2%) | 1,991 (68.8%) | -26.2% (<0.001) |
| ACER, mean (SD) | 3.57 (2.52) | 1.95 (2.22) | -45.6% (<0.001) |
| Median (IQR) | 3.00 (3.00) | 1.00 (3.00) |  |
| **Moderate COPD exacerbations** |  |  |  |
| Presence of ≥ 1 exacerbation, n (%) | 2,681 (92.6%) | 1,973 (68.2%) | -26.4% (<0.001) |
| ACER, mean (SD) | 3.41 (2.42) | 1.88 (2.14) | -44.9% (<0.001) |
| Median (IQR) | 3.00 (3.00) | 1.00 (3.00) |  |
| **Severe COPD exacerbations** |  |  |  |
| Presence of ≥ 1 exacerbation, n (%) | 330 (11.4%) | 147 (5.1%) | -55.5% (<0.001) |
| ACER, mean (SD) | 0.16 (0.55) | 0.07 (0.33) | -59.7% (<0.001) |
| Median (IQR) | 0.00 (0.00) | 0.00 (0.00) |  |

**Note:** Relative change, %, was calculated by subtracting the post-index value minus the pre-index value and dividing by the pre-index value.

**Abbreviations:** AAER, annual asthma exacerbation rate; ACER, annual COPD exacerbation rate; COPD, chronic obstructive pulmonary disease; IQR, interquartile range; SD, standard deviation

**Supplemental Table 2.** Annual asthma and COPD exacerbation rates among severe asthma patients with concomitant COPD initiating benralizumab by payer type

|  | Severe Asthma Patients with Concomitant COPD  By Payer Type | | | | | | | | |
| --- | --- | --- | --- | --- | --- | --- | --- | --- | --- |
| Commercial, N=273 | | | Medicare, N=2,202 | | | Managed Medicaid, N=419 | | |
| Pre Index | Post Index | Relative Change, % (*p*-value) | Pre Index | Post Index | Relative Change, % (*p*-value) | Pre Index | Post Index | Relative Change, % (*p*-value) |
| **Asthma exacerbations** |  |  |  |  |  |  |  |  |  |
| Presence of ≥ 1 exacerbation, n (%) | 273 (100.0%) | 207 (75.8%) | -24.2% (<0.001) | 2,202 (100.0%) | 1,677 (76.2%) | -23.8% (<0.001) | 419 (100.0%) | 338 (80.7%) | -19.3% (<0.001) |
| AAER, mean (SD) | 3.91 (2.08) | 2.39 (2.44) | -38.8% (<0.001) | 3.92 (2.12) | 2.34 (2.31) | -40.4% (<0.001) | 4.49 (2.49) | 2.95 (2.74) | -34.1% (<0.001) |
| Median (IQR) | 3.00 (3.00) | 2.00 (3.00) |  | 3.00 (3.00) | 2.00 (2.00) |  | 4.00 (4.00) | 2.00 (4.00) |  |
| **COPD exacerbations (moderate + severe)** |  |  |  |  |  |  |  |  |  |
| Presence of ≥ 1 exacerbation, n (%) | 259 (94.9%) | 177 (64.8%) | -31.7% (<0.001) | 2,031 (92.2%) | 1,487 (67.5%) | -26.8% (<0.001) | 408 (97.4%) | 327 (78.0%) | -19.9% (<0.001) |
| ACER, mean (SD) | 3.36 (2.18) | 1.63 (2.02) | -51.4% (<0.001) | 3.40 (2.44) | 1.82 (2.09) | -46.4% (<0.001) | 4.64 (2.82) | 2.81 (2.72) | -39.5% (<0.001) |
| Median (IQR) | 3.00 (3.00) | 1.00 (2.00) |  | 3.00 (3.00) | 1.00 (3.00) |  | 4.00 (4.00) | 2.00 (3.00) |  |

**Notes:** Relative change, %, was calculated by subtracting the post-index value minus the pre-index value and dividing by the pre-index value. Due to the low frequency of severe COPD exacerbations, COPD exacerbations were not reported by severity.

**Abbreviations:** AAER, annual asthma exacerbation rate; ACER, annual COPD exacerbation rate; COPD, chronic obstructive pulmonary disease; IQR, interquartile range; SD, standard deviation

**Supplemental Table 3.** Annual asthma and COPD exacerbation rates among severe asthma patients with concomitant COPD initiating benralizumab by baseline blood eosinophil levels

|  | Severe Asthma Patients with Concomitant COPD  By Baseline Eosinophil Levels | | | | | | | | |
| --- | --- | --- | --- | --- | --- | --- | --- | --- | --- |
| < 150 eosinophils/µL, N=72 | | | 150 - 299 eosinophils/µL, N=52 | | | ≥ 300 eosinophils/µL, N=141 | | |
| Pre Index | Post Index | Relative Change, % (*p*-value) | Pre Index | Post Index | Relative Change, % (*p*-value) | Pre Index | Post Index | Relative Change, % (*p*-value) |
| **Asthma exacerbations** |  |  |  |  |  |  |  |  |  |
| Presence of ≥ 1 exacerbation, n (%) | 72 (100%) | 57 (79.2%) | -20.8% (<0.001) | 52 (100%) | 42 (80.8%) | -19.2% (0.002) | 141 (100%) | 106 (75.2%) | -24.8% (<0.001) |
| AAER, mean (SD) | 3.83 (2.03) | 2.81 (2.30) | -26.8% (<0.001) | 3.96 (2.29) | 1.92 (1.75) | -51.5% (<0.001) | 3.40 (1.66) | 1.95 (1.85) | -42.7% (<0.001) |
| Median (IQR) | 3.00 (3.00) | 3.00 (3.00) |  | 3.00 (3.00) | 1.00 (2.00) |  | 3.00 (2.00) | 1.00 (2.00) |  |
| **COPD exacerbations (moderate + severe)** |  |  |  |  |  |  |  |  |  |
| Presence of ≥ 1 exacerbation, n (%) | 62 (86.1%) | 60 (83.3%) | -3.2% (0.617) | 47 (90.4%) | 38 (73.1%) | -19.1% (0.029) | 132 (93.6%) | 97 (68.8%) | -26.5% (<0.001) |
| ACER, mean (SD) | 3.15 (2.57) | 2.28 (2.07) | -27.8% (0.002) | 3.46 (2.48) | 2.00 (1.81) | -42.2% (<0.001) | 3.21 (2.06) | 1.58 (1.68) | -50.8% (<0.001) |
| Median (IQR) | 3.00 (4.00) | 2.00 (2.00) |  | 3.00 (3.00) | 2.00 (3.00) |  | 3.00 (3.00) | 1.00 (3.00) |  |

**Notes:** Relative change, %, was calculated by subtracting the post-index value minus the pre-index value and dividing by the pre-index value. Due to the low frequency of severe COPD exacerbations, COPD exacerbations were not reported by severity.

**Abbreviations:** AAER, annual asthma exacerbation rate; ACER, annual COPD exacerbation rate; COPD, chronic obstructive pulmonary disease; IQR, interquartile range; SD, standard deviation
